# Supplementary material
Source: Springer Nature journal article supplement (https://www.springermedizin.de/resource/supplementary/12967_2011_853_MOESM4_ESM.pdf/9577176)

**Plasma Aldosterone AUC  
(fold change over vehicle)**

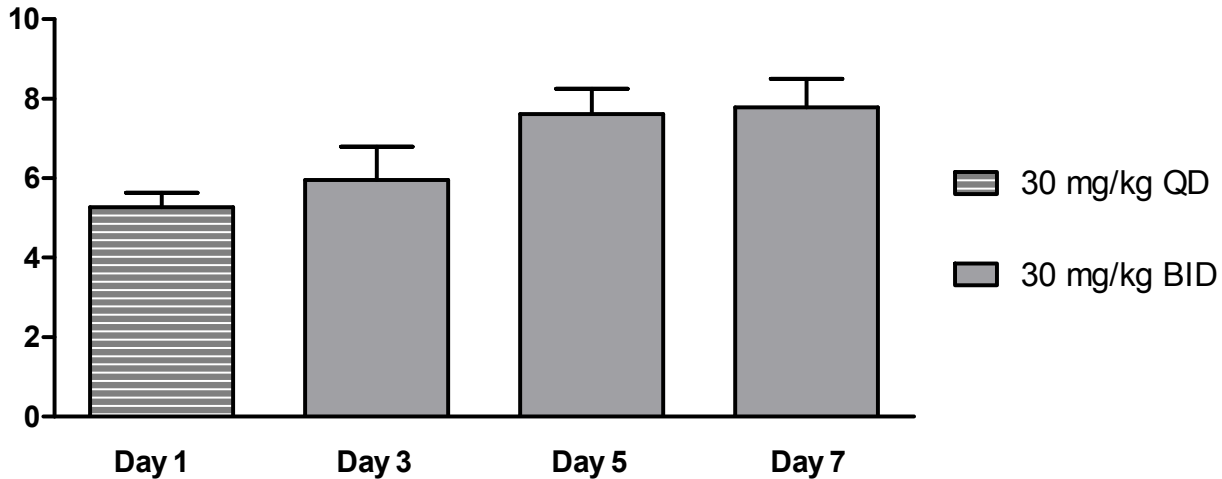

Supplement: MOESM4 [file 9577176]
